# Supplementary material
Source: HighWire-hosted journal article supplement (http://erj.ersjournals.com/highwire/filestream/114560/field_highwire_adjunct_files/1/ERJ-01149-2014_Table_S1.pdf)
Supplement: ERJ-01149-2014_Table_S1.pdf [file ERJ-01149-2014_Table_S1.pdf]

| Malagasy<br>n= 2491 | Parameter                                | Men (n = 1428)    |       | Women (n = 1063)  |       |
|---------------------|------------------------------------------|-------------------|-------|-------------------|-------|
|                     |                                          | Mean (Min-Max)    | SEM   | Mean (Min-Max)    | SEM   |
|                     | FVC (L)                                  | 3.69 (1.75-6.92)  | 0.016 | 2.84 (1.14-4.52)  | 0.015 |
|                     | FEV1 (L)                                 | 3.17 (1.3-5.56)   | 0.014 | 2.46 (0.87-3.71)  | 0.013 |
|                     | FEV1/FVC                                 | 0.86 (0.57-0.99)  | 0.002 | 0.87 (0.42-0.99)  | 0.002 |
|                     | PEF (Ls <sup>-1</sup> )                  | 8.43 (3.62-14.52) | 0.038 | 6.25 (2.22-10.14) | 0.034 |
|                     | FEF <sub>25</sub> (Ls <sup>-1</sup> )    | 7.38 (2.51-13.68) | 0.039 | 5.68 (1.92-9.8)   | 0.034 |
|                     | FEF <sub>50</sub> (Ls <sup>-1</sup> )    | 4.33 (0.97-8.67)  | 0.029 | 3.51 (0.72-8.22)  | 0.029 |
|                     | FEF <sub>75</sub> (Ls <sup>-1</sup> )    | 1.75 (0.31-4.54)  | 0.016 | 1.36 (0.22-4.11)  | 0.015 |
|                     | FEF <sub>25-75</sub> (Ls <sup>-1</sup> ) | 3.71 (0.79-7.61)  | 0.025 | 2.99 (0.46-6.46)  | 0.025 |

**TABLE S1.** Malagasy subject spirometry observed values. Data are presented as mean (Min-Max), SEM= standard error of the mean
